# Supplementary material
Source: PubMed Central journal article supplement (PMC8166851)
Supplement: 41423_2020_524_MOESM1_ESM.pdf [file 41423_2020_524_MOESM1_ESM.pdf]

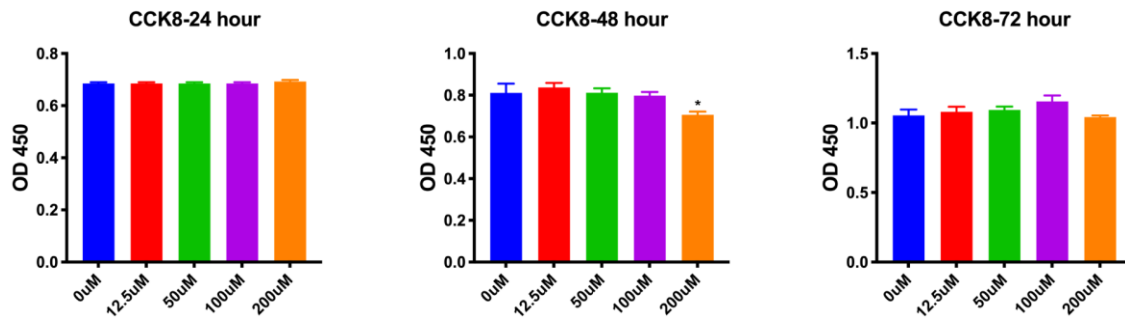

Supplementary Figure 1

**Supplementary Figure 1** Mn<sup>2+</sup> does not affect the tumor cell growth *in vitro*. Hepa1-6 cells were treated with or without MnCl<sub>2</sub> for 24, 48, or 72 hours *in vitro*. CCK-8 assay was performed to examine cell proliferation. Data shown are mean ± SEM. All data are representative of two independent experiments. One-way ANOVA followed by Dunnett's multiple comparisons test was used for statistical analysis. \**p* < 0.05.

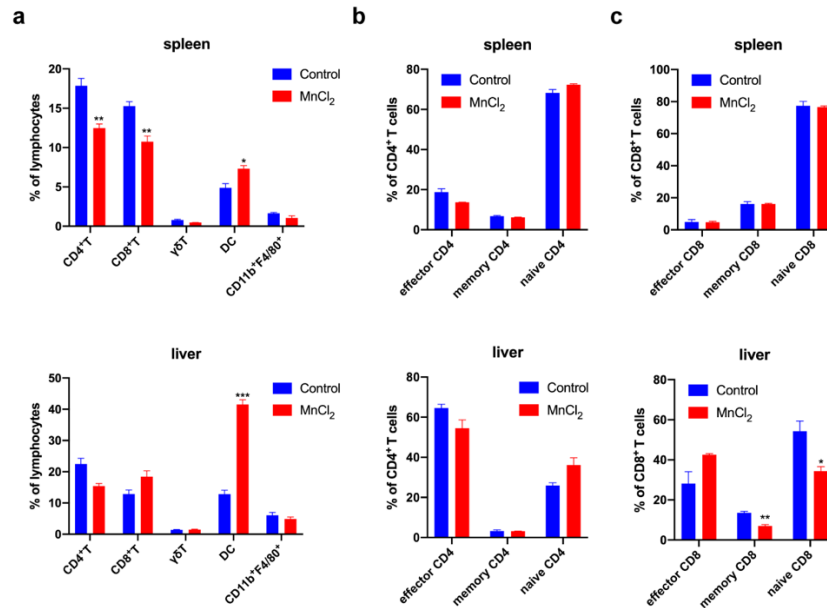

Supplementary Figure 2

**Supplementary Figure 2** Percentages of T cells and myeloid cells in the spleen and liver of tumor-bearing mice upon Mn<sup>2+</sup> treatment. Murine orthotopic HCC model was established by hydrodynamic injection of hepa1-6 cells (1.5×10<sup>6</sup> cells/2ml/mouse, n=5 or 6 per group). MnCl<sub>2</sub> in 200μl PBS was administered to the tumor-bearing mice once every other day at 5mg/kg body weight intravenously from day 1. PBS was injected as controls. On day 7, the mice were euthanized, and the lymphocytes were isolated from the spleen and tumor-bearing liver. The immune cells subsets from the spleen and liver were detected by flow cytometry. a. The percentages of CD4<sup>+</sup>T, CD8<sup>+</sup>T, γδT, DC and macrophages in the spleen and tumor-bearing liver of HCC mice. b. The percentages of effector CD4<sup>+</sup>T, memory CD4<sup>+</sup>T and naïve CD4<sup>+</sup>T cells in the spleen and tumor-bearing liver of HCC mice. c. The percentages of effector CD8<sup>+</sup>T, memory CD8<sup>+</sup>T and naïve CD8<sup>+</sup>T cells in the spleen and tumor-bearing liver of HCC mice. Data shown are mean ± SEM. All data are representative of at least three independent experiments. Two-tail unpaired student's t-test was used for statistical analysis. \**p* < 0.05, \*\**p* < 0.01, \*\*\**p* < 0.001.

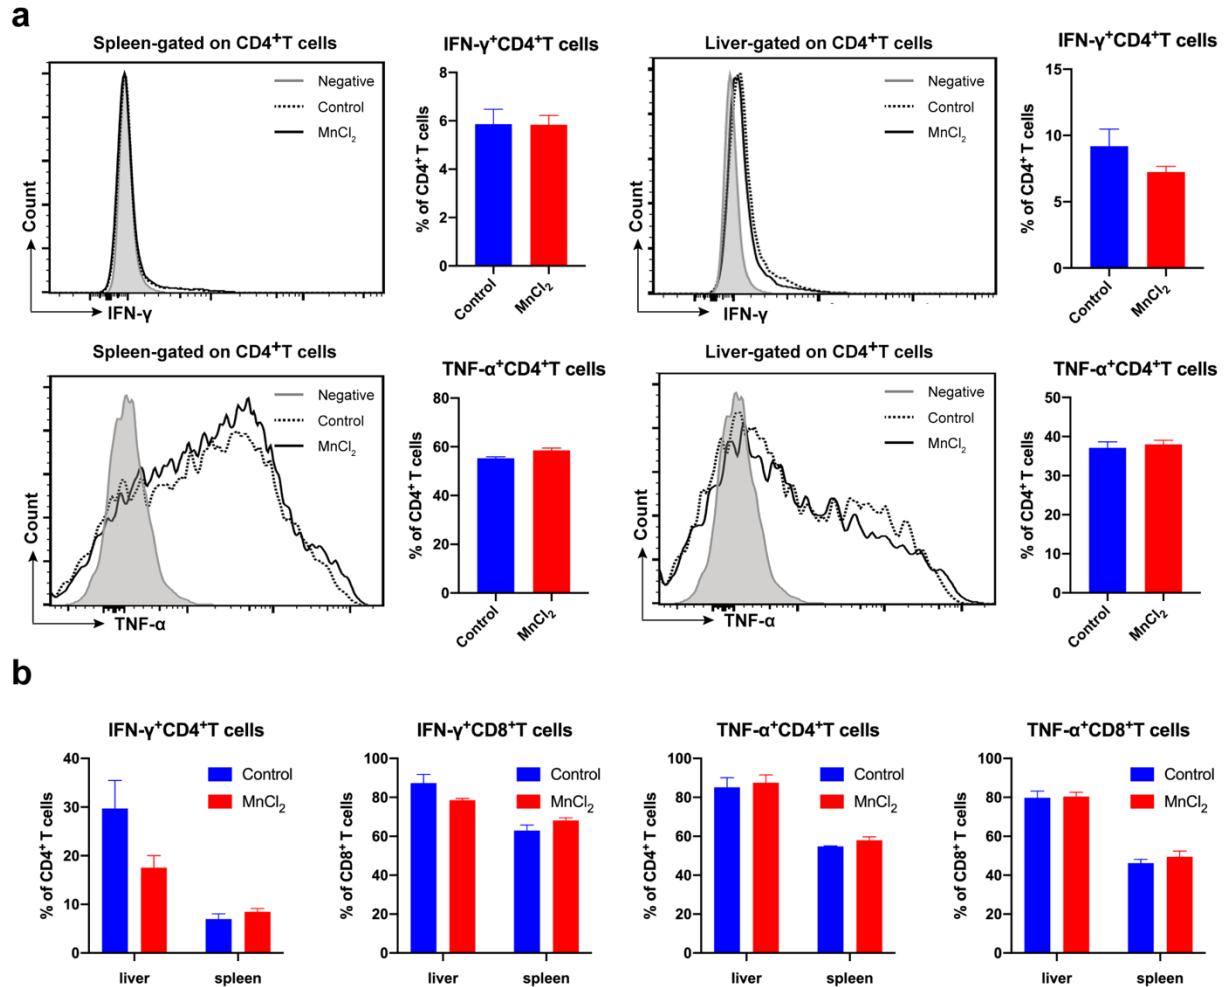

Supplementary Figure 3

**Supplementary Figure 3** Cytokine production by CD4<sup>+</sup> T cells in the spleen and liver of tumor-bearing mice and the direct effect of Mn<sup>2+</sup> treatment in T cells. Murine orthotopic HCC model was established by hydrodynamic injection of hepa1-6 cells (1.5×10<sup>6</sup> cells/2ml/mouse, n=5 or 6 per group). MnCl<sub>2</sub> in 200ul PBS was administered to the tumor-bearing mice once every other day at 5mg/kg body weight intravenously from day 1. PBS was injected as controls. On day 7, the mice were euthanized, and the lymphocytes were isolated from the spleen and tumor-bearing liver. The immune cells subsets from the spleen and liver and cytokine production were detected by flow cytometry. a. The IFN- $\gamma$  and TNF- $\alpha$  productions in the CD4<sup>+</sup>T from the spleen and liver

of tumor-bearing mice. b. CD3<sup>+</sup>T cells isolated from the spleen and liver of tumor-bearing mice were stimulated with or without MnCl<sub>2</sub> (5μM) *in vitro* in the presence of anti-mouse CD3 (2μg/ml) and anti-mouse CD28 (1μg/ml). 3 days later, the percentages of IFN-γ or TNF-α producing CD4<sup>+</sup>T and CD8<sup>+</sup>T cells were detected by flow cytometry (n=3 repeats per group). Data shown are mean ± SEM. All data are representative of at least three independent experiments. Two-tail unpaired student's t-test was used for statistical analysis.

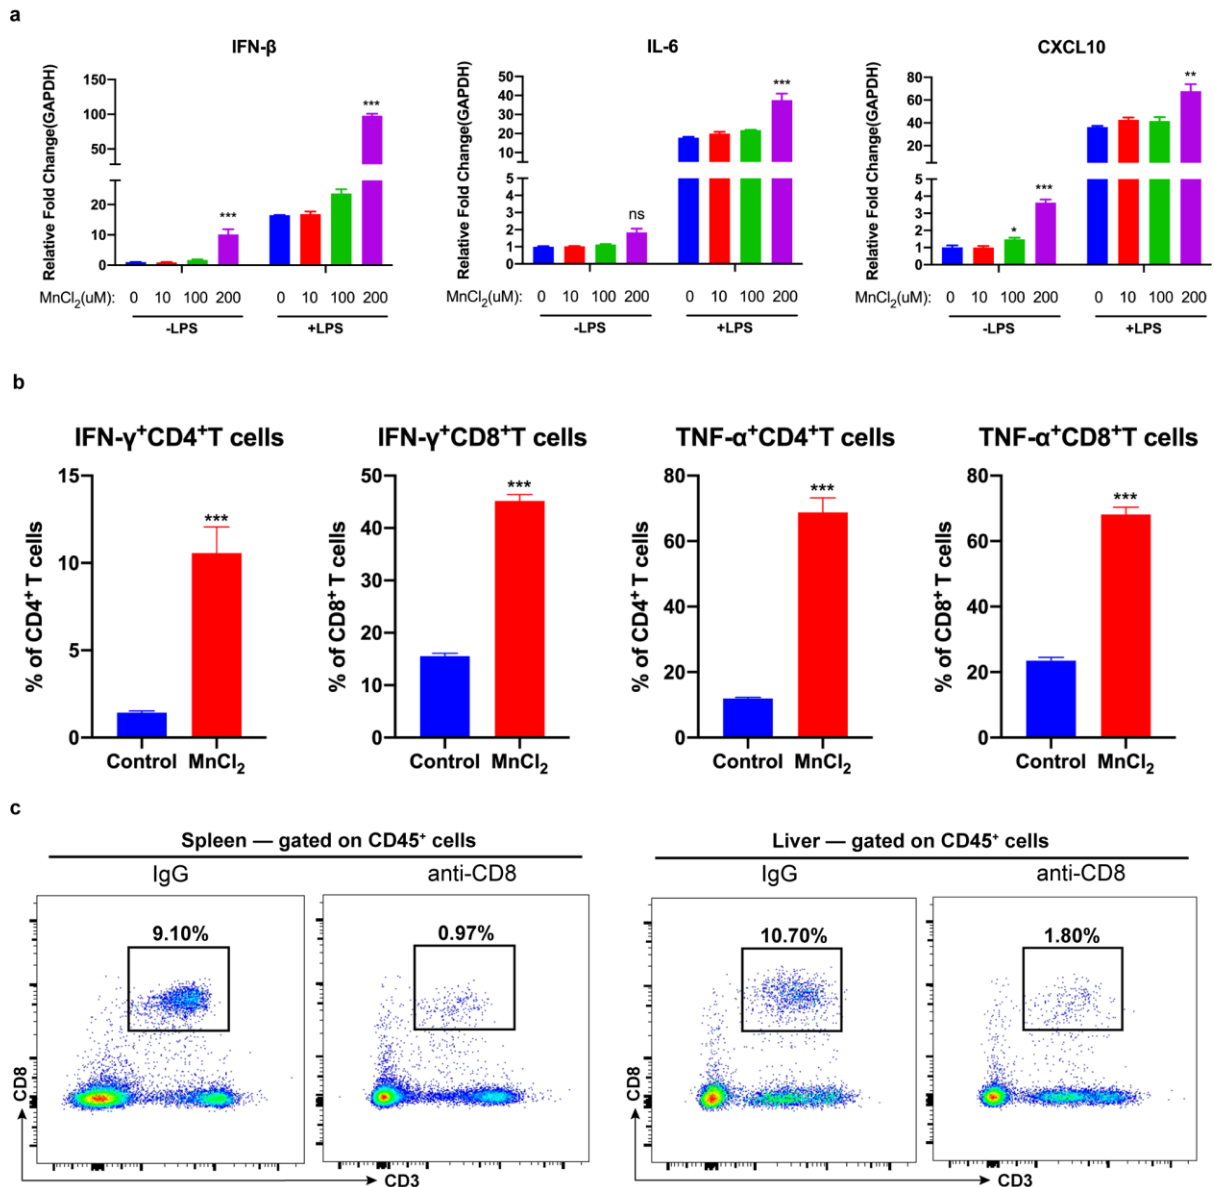

Supplementary Figure 4

**Supplementary Figure 4** The effect of Mn<sup>2+</sup> treatment on macrophages and subsequent induction of cytokine production of T cells *in vitro*. J774A.1 cells were stimulated with different doses of MnCl<sub>2</sub> (0, 10, 100, 200 μM) in the presence or absence of LPS (1 μg/ml). a. The expressions of IFN-β, IL-6, CXCL10 in J774A.1 cells were detected by qPCR. b. Sorted CD3<sup>+</sup>T cells from naïve mice were cultured with the supernatants of J774A.1 cells stimulated with or without MnCl<sub>2</sub> and LPS. 3 days later, the productions of IFN-γ and TNF-α by T cells were

detected by flow cytometry. c. The depletion of CD8<sup>+</sup>T cells *in vivo*. Murine orthotopic HCC model was established by hydrodynamic injection of hepa1-6 cells ( $1 \times 10^6$  cells/2ml/mouse, n=5 or 6 per group). MnCl<sub>2</sub> in 200μl PBS was administered to the tumor-bearing mice once every other day at 5mg/kg body weight intravenously from day 1 to day 20. PBS was injected as controls. Tumor-bearing mice treated with MnCl<sub>2</sub> or PBS were injected with anti-CD8 antibody intraperitoneally (300μg/200ul/mouse) once every week. IgG (300μg/200μl/mouse) was injected into the tumor-bearing mice as isotype controls. 3 weeks later, the percentages of CD8<sup>+</sup>T cells was detected in the spleen (left panel) and liver (right panel) of tumor-bearing mice. Data shown are the representative of two independent experiments. Data shown are mean ± SEM. Data are representative of at least two independent experiments. Two-tail unpaired student's t-test (b) or one-way ANOVA followed by Dunnett's multiple comparisons test (a) was used for statistical analysis. \* $p < 0.05$ , \*\* $p < 0.01$ , \*\*\* $p < 0.001$ .
